# Supplementary material for: Molecular Identification and Taxonomic Implication of Herbal Species in Genus Corydalis (Papaveraceae)
Source: PubMed Central journal article supplement (PMC6100380; doi:10.3390/molecules23061393), 2018-06-08
Supplement: molecules-23-01393-s001.pdf [file molecules-23-01393-s001.pdf]

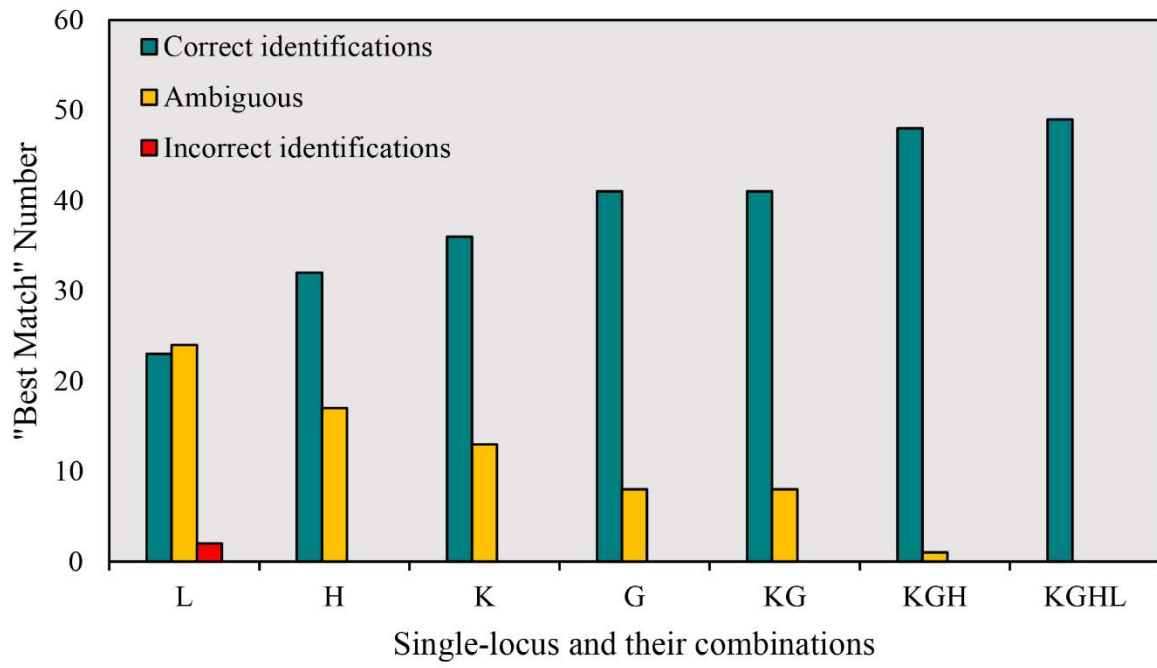

Figure S2: Species identification efficiency based on "Best Match".

(a) Histogram of distances

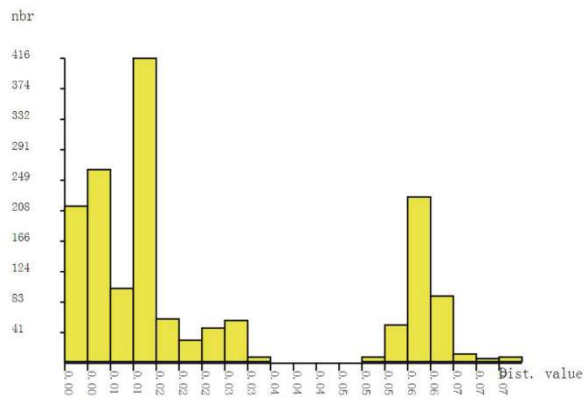

(b) Ranked distances

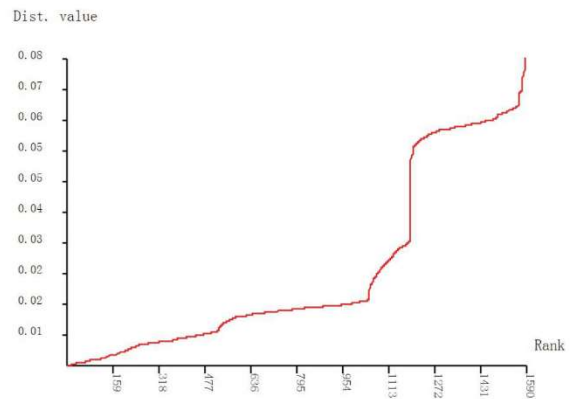

(c)

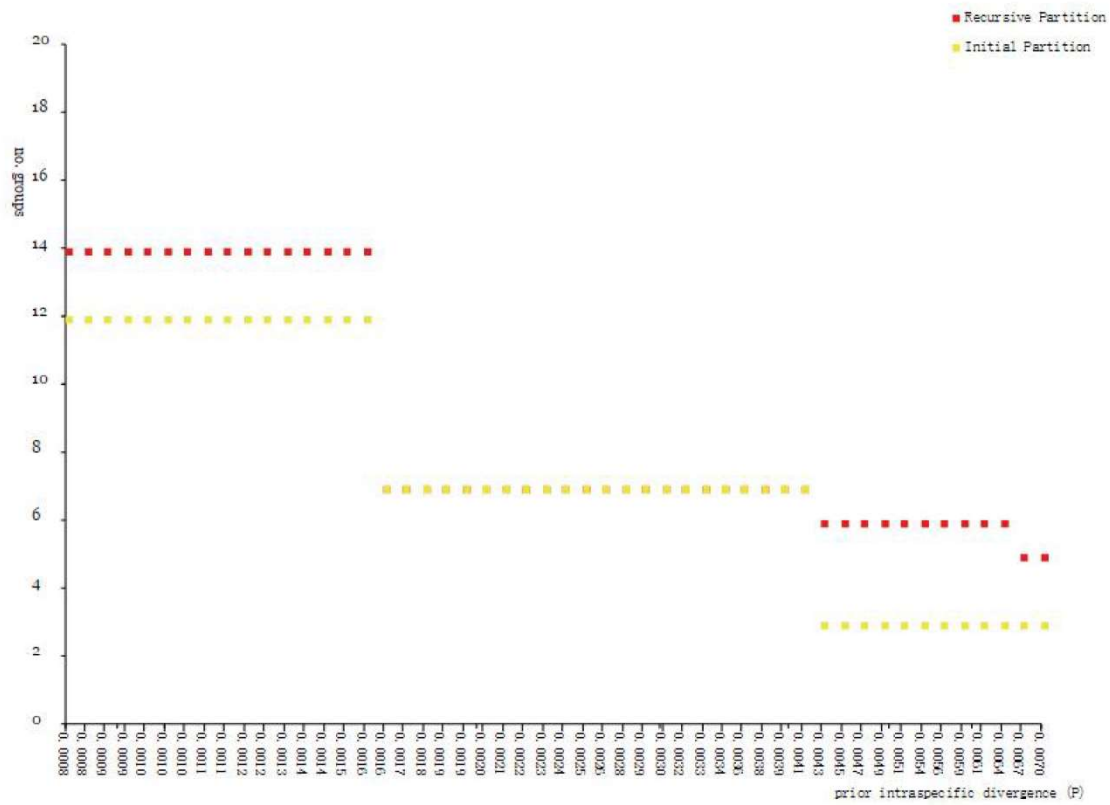

Figure S3: Graph of ABGD web results using K80 Kimura measure of distance.

Table S1: Collection details and NCBI accession numbers of samples used in this study.

| Species                      | Locality of Collection | Longitude, Latitude and altitude | matK     | psbA-trnH | rbcL     | trnG     |
|------------------------------|------------------------|----------------------------------|----------|-----------|----------|----------|
| <i>Corydalis ambigua</i> 321 | Ji'an City, China      | E126°20'13.3"N41°22'42.8"H602.1m | MF573564 | MF573619  | MF573674 | MF573729 |
| <i>Corydalis ambigua</i> 52  | Ji'an City, China      | E126°20'14.2"N41°22'41.3"H614m   | MF573565 | MF573620  | MF573675 | MF573730 |
| <i>Corydalis ambigua</i> 72  | Tonghua City, China    | E126°01'3.7"N41°43'15.9"H588m    | MF573566 | MF573621  | MF573676 | MF573731 |
| <i>Corydalis ambigua</i> 92  | Linjiang City, China   | E126°45'34.5"N41°54'21.8"H656m   | MF573567 | MF573622  | MF573677 | MF573732 |

|                               |                           |                                   |          |          |          |          |
|-------------------------------|---------------------------|-----------------------------------|----------|----------|----------|----------|
| Corydalis buschii 322         | Baishan City, China       | E127°28'2.06"N42°09'34.45" H753m  | MG748615 | MG748617 | MG748619 | MG748621 |
| Corydalis caudata 292         | Suzhou City, China        | E116°52'30.75"N34°10'01.59"H78m   | MF573568 | MF573623 | MF573678 | MF573733 |
| Corydalis caudata 32          | Luoyang City, China       | E111°50'15.81"N33°41'26.87"H1463m | MF573569 | MF573624 | MF573679 | MF573734 |
| Corydalis caudata 35          | Luoyang City, China       | E111°50'15.85"N33°41'25.18"H1490m | MF573570 | MF573625 | MF573680 | MF573735 |
| Corydalis decumbens 1         | Tongling City, China      | E117°56'57.86"N30°54'07.75"H186m  | MF573571 | MF573626 | MF573681 | MF573736 |
| Corydalis decumbens 16        | Chuzhou City, China       | E117°33'36.09"N32°52'48.87"H59m   | MF573572 | MF573627 | MF573682 | MF573737 |
| Corydalis decumbens 17        | Ma'anshan City, China     | E118°34'53.74"N31°35'42.18"H130m  | MF573573 | MF573628 | MF573683 | MF573738 |
| Corydalis decumbens 286       | Huangshan City, China     | E117°31'51.58"N30°00'53.99"H468m  | MF573574 | MF573629 | MF573684 | MF573739 |
| Corydalis edulis 306          | Chuzhou City, China       | E117°33'38.92"N32°52'53.84"H81m   | MF573575 | MF573630 | MF573685 | MF573740 |
| Corydalis fumariifolia 102    | Jilin City, China         | E126°37'23.67"N43°25'29.81"H591m  | MF573576 | MF573631 | MF573686 | MF573741 |
| Corydalis fumariifolia 110    | Shangzhi City, China      | E127°33'17.47"N45°17'44.99"H329m  | MF573577 | MF573632 | MF573687 | MF573742 |
| Corydalis fumariifolia 111    | Mudanjiang City, China    | E128°54'39.1"N44°03'36.2" H355m   | MF573578 | MF573633 | MF573688 | MF573743 |
| Corydalis fumariifolia 309    | Huinan County, China      | E126°35'39.9"N42°32'7.8"H649m     | MF573579 | MF573634 | MF573689 | MF573744 |
| Corydalis fumariifolia 313    | Huinan County, China      | E126°16'59.1"N42°26'3.2"H389.7m   | MF573580 | MF573635 | MF573690 | MF573745 |
| Corydalis fumariifolia 314    | Tonghua City, China       | E126°35'38.08"N42°31'56.04"H620m  | MF573581 | MF573636 | MF573691 | MF573746 |
| Corydalis fumariifolia 318    | Harbin City, China        | E127°33'47.19"N45°17'39.51"H353m  | MF573582 | MF573637 | MF573692 | MF573747 |
| Corydalis fumariifolia 62     | Benxi City, China         | E124°53'15.92"N41°19'3.84"H1220m  | MF573583 | MF573638 | MF573693 | MF573748 |
| Corydalis huangshanensis 295  | Huangshan District, China | E118°08'50.04"N30°05'14.92"H639m  | MF573584 | MF573639 | MF573694 | MF573749 |
| Corydalis huangshanensis 296  | Huangshan District, China | E118°09'44.58"N30°03'39.03" H600m | MF573585 | MF573640 | MF573695 | MF573750 |
| Corydalis humilis 211         | Dongchang District, China | E125°59'24.7"N41°44'25.9"H443.9m  | MF573586 | MF573641 | MF573696 | MF573751 |
| Corydalis humilis 212         | Ji'an City, China         | E125°43'16.05"N41°14'40.89"H604m  | MF573587 | MF573642 | MF573697 | MF573752 |
| Corydalis humilis 248         | Liuhe County, China       | E126°10'2.4"N42°07'49.1"H591.8m   | MF573588 | MF573643 | MF573698 | MF573753 |
| Corydalis humilis 307         | Huinan County, China      | E126°35'44.79"N42°32'12.95"H633m  | MF573589 | MF573644 | MF573699 | MF573754 |
| Corydalis humilis 308         | Tonghua City, China       | E126°35'53.31"N42°32'7.35"H700m   | MF573590 | MF573645 | MF573700 | MF573755 |
| Corydalis humosa 26           | Song County, China        | E111°50'11.38"N33°41'20.78"H1650m | MF573591 | MF573646 | MF573701 | MF573756 |
| Corydalis humosa 27           | Song County, China        | E111°50'11.38"N33°41'20.77"H1648m | MF573592 | MF573647 | MF573702 | MF573757 |
| Corydalis humosa 28           | Song County, China        | E111°50'11.37"N33°41'20.66"H1640m | MF573593 | MF573648 | MF573703 | MF573758 |
| Corydalis kiautschouensis 221 | Benxi City, China         | E125°25'10.4"N41°13'14.0"H440m    | MF573594 | MF573649 | MF573704 | MF573759 |
| Corydalis kiautschouensis 297 | Weihai City, China        | E122°06'6.1"N37°28'57.8"H225m     | MF573595 | MF573650 | MF573705 | MF573760 |
| Corydalis kiautschouensis 299 | Muping district, China    | E121°50'09.45"N37°12'15.61"H125m  | MF573596 | MF573651 | MF573706 | MF573761 |
| Corydalis kiautschouensis 300 | Yantai City, China        | E121°50'19.5"N37°12'15.77"H119m   | MF573597 | MF573652 | MF573707 | MF573762 |

|                                       |                              |                                  |                                     |
|---------------------------------------|------------------------------|----------------------------------|-------------------------------------|
| <i>Corydalis linjiangensis</i><br>166 | Tonghua City,<br>China       | E126°05'5.9"N41°53'56.4"H930m    | MF573598 MF573653 MF573708 MF573763 |
| <i>Corydalis linjiangensis</i><br>42  | Linjiang City,<br>China      | E126°42'6.7"N41°51'14.9"H1041m   | MF573599 MF573654 MF573709 MF573764 |
| <i>Corydalis linjiangensis</i><br>43  | Linjiang City,<br>China      | E126°45'10.0"N41°54'33.6"H710m   | MF573600 MF573655 MF573710 MF573765 |
| <i>Corydalis linjiangensis</i><br>47  | Baishan City,<br>China       | E126°40'14.27"N41°53'32.47"H819m | MF573601 MF573656 MF573711 MF573766 |
| <i>Corydalis schanginii</i><br>29     | Aletai City, China           | E88°08'58.53"N47°50'01.38"H1003m | MF573602 MF573657 MF573712 MF573767 |
| <i>Corydalis schanginii</i><br>30     | Fuhai County,<br>China       | E87°29'04.12"N47°06'14.41"H497m  | MG748616 MG748618 MG748620 MG748622 |
| <i>Corydalis schanginii</i><br>31     | Aletai City, China           | E87°20'12.13"N47°49'37.85"H992m  | MF573603 MF573658 MF573713 MF573768 |
| <i>Corydalis turtschaninovii</i> 162  | Dongchang<br>District, China | E126°19'45.6"N41°26'58.1"H678m   | MF573604 MF573659 MF573714 MF573769 |
| <i>Corydalis turtschaninovii</i> 164  | Dongchang<br>District, China | E126°20'01.49"N41°26'51.72"H711m | MF573605 MF573660 MF573715 MF573770 |
| <i>Corydalis turtschaninovii</i> 170  | Jilin City, China            | E126°37'40.80"N43°25'27.89"H607m | MF573606 MF573661 MF573716 MF573771 |
| <i>Corydalis turtschaninovii</i> 315  | Huinan County,<br>China      | E126°35'42.1"N42°32'8.3"H671m    | MF573607 MF573662 MF573717 MF573772 |
| <i>Corydalis turtschaninovii</i> 316  | Baishan City,<br>China       | E127°17'12.4"N41°30'47.0"H699m   | MF573608 MF573663 MF573718 MF573773 |
| <i>Corydalis turtschaninovii</i> 317  | Liaoyuan City,<br>China      | E125°17'12.4"N42°23'49.6"H420m   | MF573609 MF573664 MF573719 MF573774 |
| <i>Corydalis watanabei</i><br>252     | Tonghua City,<br>China       | E126°18'24.94"N41°23'50.48"H813m | MF573610 MF573665 MF573720 MF573775 |
| <i>Corydalis watanabei</i><br>257     | Benxi City, China            | E124°53'55.7"N41°18'4.5"H822m    | MF573611 MF573666 MF573721 MF573776 |
| <i>Corydalis watanabei</i><br>265     | Linjiang City,<br>China      | E126°42'00.14"N41°51'10.03"H993m | MF573612 MF573667 MF573722 MF573777 |
| <i>Corydalis watanabei</i><br>273     | Harbin City, China           | E127°33'33.4" N45°21'13.8"H400m  | MF573613 MF573668 MF573723 MF573778 |
| <i>Corydalis yanhusuo</i><br>24       | Hefei City, China            | E117°10'18.88"N31°50'31.21"H232m | MF573614 MF573669 MF573724 MF573779 |
| <i>Corydalis yanhusuo</i><br>275      | Chuzhou City,<br>China       | E117°59'39.41"N32°03'23.15"H90m  | MF573615 MF573670 MF573725 MF573780 |
| <i>Corydalis yanhusuo</i><br>280      | Mingguang City,<br>China     | E118°14'02.33"N32°37'29.13"H318m | MF573616 MF573671 MF573726 MF573781 |
| <i>Corydalis yanhusuo</i><br>283      | Jinhua City, China           | E120°27'06.12"N29°03'28.18"H363m | MF573617 MF573672 MF573727 MF573782 |
| <i>Corydalis yanhusuo</i><br>289      | Nanjing City,<br>China       | E118°57'52.10"N32°30'06.05"H137m | MF573618 MF573673 MF573728 MF573783 |

Table S2: The universal amplification primers used in this study.

| Primer name | Length | Sequence                | References/sources               |
|-------------|--------|-------------------------|----------------------------------|
| matK1166    | 16     | GGCTTACTAATGGGAT        | Pérez-Gutiérrez et al. 2015 [11] |
| matK192     | 20     | CGGGTTGCAAMAATAAAGGA    | Pérez-Gutiérrez et al. 2015 [11] |
| psbA        | 22     | GTTATGCATGAACGTAATGCTC  | Sang et al. 1997 [23]            |
| trnH        | 23     | CGCGCATGGTGGATTCACAATCC | Tate and Simpson 2003 [24]       |
| trnG        | 23     | GTAGCGGGAATCGAACCCGCATC | Shaw et al. 2005 [25]            |
| trn2G       | 23     | GCGGGTATAGTTTACTGGTAAAA | Shaw et al. 2005 [25]            |
| rbcL-1F     | 20     | ATGTCACCACAAACAGAAAC    | Kress et al. 2005 [26]           |
| rbcL-724R   | 20     | TCGCATGTACCTGCAGTAGC    | Kress et al. 2005 [26]           |
| ITS4        | 20     | TCCTCCGCTTATTGATATGC    | Baldwin et al. 1992 [27]         |

|       |    |                        |                          |
|-------|----|------------------------|--------------------------|
| ITS5B | 22 | GGAAGGAGAAGTCGTAACAAGG | Baldwin et al. 1992 [27] |
| ITS2F | 20 | ATGCGATACTTGGTGTGAAT   | Hou et al. 2013 [28]     |
| ITS3R | 21 | GACGCTTCTCCAGACTACAAT  | Hou et al. 2013 [28]     |

---
